# Supplementary material
Source: MDPI journal article supplement (https://www.mdpi.com/2071-1050/13/14/7816)
Supplement: s1 [file s1]

# Individual Subjective Well-Being during the COVID-19 Pandemic

**Trinh Quang Long,**  
*Asian Development Bank Institute*

## ONLINE APPENDIX

**Table S1: Summary Statistics for Each Country**

|                                              |      | PRC   | Italy | Japan | Rep. of Korea | UK    | US    |
|----------------------------------------------|------|-------|-------|-------|---------------|-------|-------|
| <b>Well-being indicators</b>                 |      |       |       |       |               |       |       |
| Not happy these days                         | Mean | 30.12 | 46.07 | 35.07 | 39.77         | 37.01 | 35.55 |
|                                              | Sd.  | 45.90 | 49.87 | 47.74 | 48.97         | 48.31 | 47.89 |
| Extremely unhappy                            | Mean | 2.31  | 11.02 | 6.01  | 6.33          | 6.99  | 6.92  |
|                                              | Sd.  | 15.03 | 31.32 | 23.78 | 24.37         | 25.51 | 25.39 |
| Moderately unhappy                           | Mean | 7.73  | 15.90 | 8.97  | 11.53         | 11.61 | 12.99 |
|                                              | Sd.  | 26.72 | 36.59 | 28.58 | 31.95         | 32.06 | 33.63 |
| Slightly unhappy                             | Mean | 20.08 | 19.16 | 20.10 | 21.91         | 18.41 | 15.64 |
|                                              | Sd.  | 40.08 | 39.37 | 40.09 | 41.39         | 38.77 | 36.34 |
| Neither happy nor unhappy                    | Mean | 24.70 | 36.78 | 42.27 | 45.69         | 24.70 | 24.64 |
|                                              | Sd.  | 43.15 | 48.24 | 49.42 | 49.84         | 43.15 | 43.11 |
| Slightly happy                               | Mean | 22.59 | 7.38  | 14.29 | 7.17          | 16.04 | 13.36 |
|                                              | Sd.  | 41.84 | 26.15 | 35.01 | 25.80         | 36.72 | 34.04 |
| Moderately happy                             | Mean | 17.67 | 8.43  | 7.00  | 6.33          | 19.09 | 20.09 |
|                                              | Sd.  | 38.16 | 27.80 | 25.52 | 24.37         | 39.32 | 40.09 |
| Extremely happy                              | Mean | 4.92  | 1.34  | 1.38  | 1.04          | 3.15  | 6.35  |
|                                              | Sd.  | 21.64 | 11.51 | 11.67 | 10.14         | 17.47 | 24.40 |
| <b>Financial and nonfinancial effects</b>    |      |       |       |       |               |       |       |
| Experienced negative nonfinancial effects    | Mean | 86.75 | 82.47 | 72.91 | 84.11         | 77.66 | 79.91 |
|                                              | Sd.  | 33.92 | 38.04 | 44.47 | 36.58         | 41.67 | 40.09 |
| Experienced positive nonfinancial effects    | Mean | 97.89 | 94.92 | 65.02 | 87.85         | 84.65 | 83.70 |
|                                              | Sd.  | 97.89 | 94.92 | 65.02 | 87.85         | 84.65 | 83.70 |
| Permanent job loss                           | Mean | 3.41  | 8.24  | 3.15  | 3.74          | 5.22  | 8.15  |
|                                              | Sd.  | 18.17 | 27.51 | 17.48 | 18.98         | 22.25 | 27.38 |
| Temporary job loss                           | Mean | 39.76 | 28.64 | 11.33 | 21.29         | 23.43 | 24.17 |
|                                              | Sd.  | 48.96 | 45.23 | 31.71 | 40.96         | 42.37 | 42.83 |
| No change in employment                      | Mean | 56.83 | 63.12 | 85.52 | 74.97         | 71.36 | 67.68 |
|                                              | Sd.  | 49.56 | 48.27 | 35.21 | 43.34         | 45.23 | 46.79 |
| Experienced a fall in household income       | Mean | 60.34 | 57.85 | 38.62 | 47.66         | 42.81 | 48.63 |
|                                              | Sd.  | 48.94 | 49.40 | 48.71 | 49.97         | 49.51 | 50.00 |
| <b>Agreement with government approach</b>    |      |       |       |       |               |       |       |
| Strongly disagree                            | Mean | 0.40  | 8.43  | 11.13 | 4.78          | 4.13  | 7.30  |
|                                              | Sd.  | 6.33  | 27.80 | 31.47 | 21.34         | 19.92 | 26.02 |
| Somewhat disagree                            | Mean | 2.31  | 10.63 | 16.85 | 8.20          | 8.27  | 8.72  |
|                                              | Sd.  | 15.03 | 30.84 | 37.45 | 27.46         | 27.55 | 28.23 |
| Neither agree nor disagree                   | Mean | 5.62  | 11.69 | 46.40 | 29.80         | 14.07 | 16.11 |
|                                              | Sd.  | 23.05 | 32.14 | 49.90 | 45.76         | 34.79 | 36.78 |
| Somewhat agree                               | Mean | 28.51 | 38.31 | 21.67 | 28.35         | 41.83 | 36.68 |
|                                              | Sd.  | 45.17 | 48.64 | 41.22 | 45.09         | 49.35 | 48.22 |
| Strongly agree                               | Mean | 63.15 | 30.94 | 3.94  | 28.87         | 31.69 | 31.18 |
|                                              | Sd.  | 48.26 | 46.25 | 19.47 | 45.34         | 46.55 | 46.35 |
| <b>Effectiveness of containment measures</b> |      |       |       |       |               |       |       |
| Shutting down schools                        | Mean | 75.80 | 78.16 | 48.47 | 66.25         | 54.63 | 74.50 |
|                                              | Sd.  | 42.85 | 41.34 | 50.00 | 47.31         | 49.81 | 43.61 |

|                                                       |      |       |       |       |       |       |       |
|-------------------------------------------------------|------|-------|-------|-------|-------|-------|-------|
| Shutting down public transport                        | Mean | 71.59 | 74.62 | 56.75 | 37.49 | 65.16 | 73.18 |
|                                                       | Sd.  | 45.12 | 43.54 | 49.57 | 48.43 | 47.67 | 44.33 |
| Shutting down nonessential businesses                 | Mean | 79.22 | 73.08 | 55.37 | 33.75 | 65.06 | 68.06 |
|                                                       | Sd.  | 40.60 | 44.37 | 49.74 | 47.31 | 47.70 | 46.65 |
| Limiting mobility outside home                        | Mean | 75.30 | 74.43 | 62.66 | 49.64 | 68.80 | 68.63 |
|                                                       | Sd.  | 43.15 | 43.65 | 48.39 | 50.02 | 46.35 | 46.42 |
| Forbidding mass gatherings                            | Mean | 80.02 | 86.21 | 70.25 | 84.11 | 80.22 | 78.67 |
|                                                       | Sd.  | 40.01 | 34.50 | 45.74 | 36.58 | 39.86 | 40.98 |
| Introducing fines for citizens                        | Mean | 73.29 | 73.28 | 48.67 | 71.55 | 59.06 | 57.82 |
|                                                       | Sd.  | 44.27 | 44.27 | 50.01 | 45.14 | 49.20 | 49.41 |
| Requiring masks to be worn outside by everyone        | Mean | 84.04 | 74.04 | 52.91 | 81.41 | 32.38 | 64.27 |
|                                                       | Sd.  | 36.65 | 43.86 | 49.94 | 38.92 | 46.82 | 47.94 |
| Beliefs and perceptions                               |      |       |       |       |       |       |       |
| Fraction of infected people                           | Mean | 11.87 | 19.34 | 32.74 | 13.83 | 23.13 | 26.81 |
|                                                       | Sd.  | 16.95 | 22.00 | 23.12 | 19.25 | 22.43 | 26.85 |
| Probability of being infected with COVID-19           | Mean | 9.99  | 13.74 | 19.82 | 10.72 | 22.26 | 21.48 |
|                                                       | Sd.  | 16.61 | 22.53 | 22.52 | 17.62 | 26.21 | 28.25 |
| Probability of infected people with no symptoms       | Mean | 21.64 | 41.19 | 41.07 | 29.46 | 33.62 | 40.06 |
|                                                       | Sd.  | 23.03 | 27.57 | 26.55 | 25.70 | 24.86 | 28.50 |
| Probability of serious illness w/o hospitalization    | Mean | 22.33 | 31.35 | 32.68 | 29.03 | 36.16 | 40.87 |
|                                                       | Sd.  | 22.98 | 25.17 | 23.27 | 25.56 | 24.40 | 27.56 |
| Probability of a serious illness with hospitalization | Mean | 35.40 | 31.12 | 28.16 | 28.79 | 31.79 | 40.38 |
|                                                       | Sd.  | 30.81 | 26.33 | 23.47 | 27.93 | 25.17 | 29.63 |
| Probability that infected people would die            | Mean | 19.18 | 25.12 | 15.34 | 15.41 | 24.56 | 30.39 |
|                                                       | Sd.  | 24.86 | 27.98 | 20.75 | 22.70 | 26.46 | 30.34 |
| Male                                                  | Mean | 49.00 | 50.86 | 48.17 | 50.16 | 49.16 | 43.45 |
|                                                       | Sd.  | 50.02 | 50.02 | 49.99 | 50.03 | 50.02 | 49.59 |

---

Source: Belot et al.'s (2020) data and author's calculation

**Table S2: Individual Happiness during the COVID-19 Pandemic (Chinese Sample, Marginal Effects)**

|                                                                  | (1)                  | (2)                   | (3)                 | (4)                             | (5)                  | (6)                  | (7)                  |
|------------------------------------------------------------------|----------------------|-----------------------|---------------------|---------------------------------|----------------------|----------------------|----------------------|
|                                                                  | Extremely<br>unhappy | Moderately<br>unhappy | Slightly<br>unhappy | Neither<br>happy nor<br>unhappy | Slightly<br>happy    | Moderately<br>happy  | Extremely<br>happy   |
| Negative nonfinancial effects                                    | 0.041***<br>[0.009]  | 0.086***<br>[0.015]   | 0.124***<br>[0.019] | 0.033***<br>[0.007]             | -0.070***<br>[0.012] | -0.144***<br>[0.021] | -0.070***<br>[0.012] |
| Positive nonfinancial effects                                    | -0.002<br>[0.013]    | -0.005<br>[0.028]     | -0.007<br>[0.040]   | -0.002<br>[0.011]               | 0.004<br>[0.023]     | 0.008<br>[0.047]     | 0.004<br>[0.023]     |
| Job loss                                                         |                      |                       |                     |                                 |                      |                      |                      |
| Temporary job lost                                               | 0.008<br>[0.008]     | 0.018<br>[0.019]      | 0.026<br>[0.031]    | 0.008<br>[0.012]                | -0.014<br>[0.014]    | -0.031<br>[0.036]    | -0.015<br>[0.020]    |
| No job lost                                                      | 0.004<br>[0.008]     | 0.008<br>[0.019]      | 0.013<br>[0.031]    | 0.005<br>[0.012]                | -0.006<br>[0.014]    | -0.015<br>[0.037]    | -0.008<br>[0.020]    |
| Experienced a fall in household income                           | 0.013***<br>[0.005]  | 0.027***<br>[0.009]   | 0.039***<br>[0.012] | 0.010***<br>[0.004]             | -0.022***<br>[0.007] | -0.045***<br>[0.014] | -0.022***<br>[0.007] |
| Agreement with the current government's approach                 |                      |                       |                     |                                 |                      |                      |                      |
| Somewhat disagree                                                | 0.018<br>[0.064]     | 0.021<br>[0.082]      | 0.013<br>[0.058]    | -0.010<br>[0.034]               | -0.019<br>[0.075]    | -0.018<br>[0.075]    | -0.005<br>[0.020]    |
| Neither agree nor disagree                                       | -0.031<br>[0.058]    | -0.050<br>[0.077]     | -0.049<br>[0.059]   | 0.007<br>[0.030]                | 0.045<br>[0.071]     | 0.058<br>[0.075]     | 0.019<br>[0.021]     |
| Somewhat agree                                                   | -0.031<br>[0.058]    | -0.049<br>[0.076]     | -0.049<br>[0.057]   | 0.007<br>[0.029]                | 0.045<br>[0.070]     | 0.057<br>[0.072]     | 0.019<br>[0.020]     |
| Strongly agree                                                   | -0.043<br>[0.058]    | -0.074<br>[0.076]     | -0.084<br>[0.057]   | -0.002<br>[0.029]               | 0.066<br>[0.070]     | 0.099<br>[0.072]     | 0.038*<br>[0.020]    |
| Effectiveness of measures (aggregate, z-score)                   | -0.005**<br>[0.002]  | -0.010**<br>[0.005]   | -0.015**<br>[0.006] | -0.004**<br>[0.002]             | 0.008**<br>[0.004]   | 0.017**<br>[0.008]   | 0.008**<br>[0.004]   |
| Belief                                                           |                      |                       |                     |                                 |                      |                      |                      |
| Fraction of infected people                                      | -0.000**<br>[0.000]  | -0.001**<br>[0.000]   | -0.001**<br>[0.000] | -0.000**<br>[0.000]             | 0.001**<br>[0.000]   | 0.001**<br>[0.001]   | 0.001**<br>[0.000]   |
| Probability of being infected                                    | -0.000<br>[0.000]    | -0.000<br>[0.000]     | -0.001<br>[0.000]   | -0.000<br>[0.000]               | 0.000<br>[0.000]     | 0.001<br>[0.001]     | 0.000<br>[0.000]     |
| Probability of infected people with no symptoms                  | 0.000<br>[0.000]     | 0.000<br>[0.000]      | 0.000<br>[0.000]    | 0.000<br>[0.000]                | -0.000<br>[0.000]    | -0.001<br>[0.000]    | -0.000<br>[0.000]    |
| Probability of serious illness without requiring hospitalization | 0.000***<br>[0.000]  | 0.001***<br>[0.000]   | 0.001***<br>[0.000] | 0.000**<br>[0.000]              | -0.000***<br>[0.000] | -0.001***<br>[0.000] | -0.000***<br>[0.000] |
| Probability of a serious illness that requires hospitalization   | -0.000<br>[0.000]    | -0.000<br>[0.000]     | -0.000<br>[0.000]   | -0.000<br>[0.000]               | 0.000<br>[0.000]     | 0.000<br>[0.000]     | 0.000<br>[0.000]     |

|                                            |           |           |           |          |          |          |          |
|--------------------------------------------|-----------|-----------|-----------|----------|----------|----------|----------|
| Probability that infected people would die | 0.000     | 0.000     | 0.000     | 0.000    | -0.000   | -0.000   | -0.000   |
|                                            | [0.000]   | [0.000]   | [0.000]   | [0.000]  | [0.000]  | [0.000]  | [0.000]  |
| Male                                       | 0.003     | 0.007     | 0.010     | 0.003    | -0.006   | -0.012   | -0.006   |
|                                            | [0.004]   | [0.007]   | [0.011]   | [0.003]  | [0.006]  | [0.012]  | [0.006]  |
| Income groups                              |           |           |           |          |          |          |          |
| Second quintile                            | -0.012    | -0.022    | -0.027*   | -0.003   | 0.020    | 0.032    | 0.013    |
|                                            | [0.008]   | [0.014]   | [0.017]   | [0.003]  | [0.012]  | [0.019]  | [0.008]  |
| Third quintile                             | -0.015*   | -0.029**  | -0.037**  | -0.005   | 0.025**  | 0.042**  | 0.018**  |
|                                            | [0.008]   | [0.014]   | [0.017]   | [0.004]  | [0.012]  | [0.020]  | [0.009]  |
| Fourth quintile                            | -0.021*** | -0.041*** | -0.056*** | -0.012** | 0.035*** | 0.065*** | 0.030*** |
|                                            | [0.008]   | [0.014]   | [0.018]   | [0.005]  | [0.011]  | [0.020]  | [0.010]  |
| Fifth quintile                             | -0.021**  | -0.041*** | -0.055*** | -0.011** | 0.034*** | 0.064*** | 0.030*** |
|                                            | [0.008]   | [0.015]   | [0.019]   | [0.006]  | [0.012]  | [0.022]  | [0.011]  |
| Preferred not to say                       | -0.023    | -0.047    | -0.066    | -0.016   | 0.039    | 0.076    | 0.037    |
|                                            | [0.027]   | [0.066]   | [0.116]   | [0.056]  | [0.043]  | [0.137]  | [0.084]  |
| Number of observations                     | 996       |           |           |          |          |          |          |

Note: Dependent variable is ordinal degree of happiness ranging from extremely unhappy to extremely happy. Standard errors in brackets; \*  $p < 0.1$ , \*\*  $p < 0.05$ , \*\*\*  $p < 0.01$ . Negative nonfinancial effect and positive nonfinancial effect are two dummy variables if individuals experience negative feeling or enjoy positive activities during the pandemic. The reference group for job loss variables is groups of those that lost job permanently because of COVID-19. Experienced a fall in household income is a dummy variable indicating those who experienced reduction in household income because of the pandemic. The reference group for degree of agreement with government approach is those who strongly disagree (with the government approach). Effectiveness of containment measures is the number of measures that respondents think are effective in containing virus. We calculate z-score for this variable. The reference group for income groups is group of those who are in the first quintile (poorest). In all specifications, we controlled for individual age, living arrangement, whether they made contact with any infected person, whether they had any COVID-19 symptoms, whether they accessed open-air areas in their living areas, whether they had traveled abroad since January 2020, and whether they kept a distance from their colleagues and regions they live.

Source: Belot et al.'s (2020) data and author's estimations

**Table S3: Individual Happiness during the COVID-19 Pandemic (Korean Sample, Marginal Effects)**

|                                                                  | (1)                  | (2)                   | (3)                  | (4)                             | (5)                  | (6)                  | (7)                  |
|------------------------------------------------------------------|----------------------|-----------------------|----------------------|---------------------------------|----------------------|----------------------|----------------------|
|                                                                  | Extremely<br>unhappy | Moderately<br>unhappy | Slightly<br>unhappy  | Neither<br>happy nor<br>unhappy | Slightly<br>happy    | Moderately<br>happy  | Extremely<br>happy   |
| Negative nonfinancial effects                                    | 0.078***<br>[0.013]  | 0.095***<br>[0.015]   | 0.087***<br>[0.013]  | -0.104***<br>[0.017]            | -0.058***<br>[0.010] | -0.077***<br>[0.013] | -0.021***<br>[0.006] |
| Positive nonfinancial effects                                    | -0.031**<br>[0.012]  | -0.038***<br>[0.015]  | -0.035***<br>[0.013] | 0.042**<br>[0.016]              | 0.023**<br>[0.009]   | 0.031**<br>[0.012]   | 0.008**<br>[0.004]   |
| Job loss                                                         |                      |                       |                      |                                 |                      |                      |                      |
| Temporary job lost                                               | -0.151***<br>[0.052] | -0.105***<br>[0.024]  | -0.025*<br>[0.014]   | 0.190***<br>[0.051]             | 0.043***<br>[0.010]  | 0.041***<br>[0.009]  | 0.007**<br>[0.003]   |
| No job lost                                                      | -0.169***<br>[0.053] | -0.127***<br>[0.024]  | -0.046***<br>[0.013] | 0.216***<br>[0.051]             | 0.056***<br>[0.009]  | 0.058***<br>[0.009]  | 0.011***<br>[0.003]  |
| Experienced a fall in household income                           | 0.035***<br>[0.009]  | 0.042***<br>[0.010]   | 0.039***<br>[0.009]  | -0.046***<br>[0.011]            | -0.026***<br>[0.007] | -0.034***<br>[0.009] | -0.009***<br>[0.003] |
| Agreement with the current government's approach                 |                      |                       |                      |                                 |                      |                      |                      |
| Somewhat disagree                                                | -0.101**<br>[0.045]  | -0.064**<br>[0.025]   | -0.007<br>[0.011]    | 0.124**<br>[0.050]              | 0.024**<br>[0.010]   | 0.021**<br>[0.009]   | 0.003*<br>[0.002]    |
| Neither agree nor disagree                                       | -0.140***<br>[0.042] | -0.106***<br>[0.022]  | -0.034***<br>[0.011] | 0.183***<br>[0.044]             | 0.045***<br>[0.009]  | 0.044***<br>[0.009]  | 0.008***<br>[0.003]  |
| Somewhat agree                                                   | -0.160***<br>[0.042] | -0.136***<br>[0.024]  | -0.064***<br>[0.013] | 0.213***<br>[0.044]             | 0.064***<br>[0.010]  | 0.069***<br>[0.011]  | 0.015***<br>[0.005]  |
| Strongly agree                                                   | -0.152***<br>[0.042] | -0.124***<br>[0.023]  | -0.051***<br>[0.012] | 0.202***<br>[0.044]             | 0.055***<br>[0.010]  | 0.058***<br>[0.010]  | 0.012***<br>[0.004]  |
| Effectiveness of measures (aggregate, z-score)                   | -0.001<br>[0.004]    | -0.001<br>[0.005]     | -0.001<br>[0.005]    | 0.001<br>[0.006]                | 0.001<br>[0.003]     | 0.001<br>[0.004]     | 0.000<br>[0.001]     |
| Belief                                                           |                      |                       |                      |                                 |                      |                      |                      |
| Fraction of infected people                                      | -0.000<br>[0.000]    | -0.000<br>[0.000]     | -0.000<br>[0.000]    | 0.000<br>[0.000]                | 0.000<br>[0.000]     | 0.000<br>[0.000]     | 0.000<br>[0.000]     |
| Probability of being infected                                    | 0.000<br>[0.000]     | 0.000<br>[0.000]      | 0.000<br>[0.000]     | -0.000<br>[0.000]               | -0.000<br>[0.000]    | -0.000<br>[0.000]    | -0.000<br>[0.000]    |
| Probability of infected people with no symptoms                  | 0.000<br>[0.000]     | 0.000<br>[0.000]      | 0.000<br>[0.000]     | -0.000<br>[0.000]               | -0.000<br>[0.000]    | -0.000<br>[0.000]    | -0.000<br>[0.000]    |
| Probability of serious illness without requiring hospitalization | -0.000               | -0.000                | -0.000               | 0.000                           | 0.000                | 0.000                | 0.000                |

|                                                                |         |         |         |          |          |          |          |
|----------------------------------------------------------------|---------|---------|---------|----------|----------|----------|----------|
|                                                                | [0.000] | [0.000] | [0.000] | [0.000]  | [0.000]  | [0.000]  | [0.000]  |
| Probability of a serious illness that requires hospitalization | 0.000   | 0.000   | 0.000   | -0.000   | -0.000   | -0.000   | -0.000   |
|                                                                | [0.000] | [0.000] | [0.000] | [0.000]  | [0.000]  | [0.000]  | [0.000]  |
| Probability that infected people would die                     | 0.000   | 0.000   | 0.000   | -0.000   | -0.000   | -0.000   | -0.000   |
|                                                                | [0.000] | [0.000] | [0.000] | [0.000]  | [0.000]  | [0.000]  | [0.000]  |
| Male                                                           | 0.018** | 0.022** | 0.020** | -0.024** | -0.013** | -0.018** | -0.005** |
|                                                                | [0.008] | [0.009] | [0.008] | [0.010]  | [0.006]  | [0.008]  | [0.002]  |
| Income groups                                                  |         |         |         |          |          |          |          |
| Second quintile                                                | -0.001  | -0.001  | -0.001  | 0.001    | 0.000    | 0.001    | 0.000    |
|                                                                | [0.013] | [0.015] | [0.012] | [0.019]  | [0.009]  | [0.011]  | [0.003]  |
| Third quintile                                                 | -0.015  | -0.018  | -0.016  | 0.021    | 0.011    | 0.014    | 0.004    |
|                                                                | [0.012] | [0.015] | [0.013] | [0.017]  | [0.009]  | [0.011]  | [0.003]  |
| Fourth quintile                                                | -0.015  | -0.018  | -0.016  | 0.020    | 0.011    | 0.014    | 0.004    |
|                                                                | [0.013] | [0.015] | [0.013] | [0.017]  | [0.009]  | [0.011]  | [0.003]  |
| Fifth quintile                                                 | -0.014  | -0.017  | -0.015  | 0.020    | 0.010    | 0.013    | 0.004    |
|                                                                | [0.013] | [0.016] | [0.014] | [0.018]  | [0.010]  | [0.012]  | [0.003]  |
| Preferred not to say                                           | -0.026  | -0.033  | -0.031  | 0.034*   | 0.021    | 0.028    | 0.008    |
|                                                                | [0.016] | [0.022] | [0.023] | [0.019]  | [0.015]  | [0.021]  | [0.007]  |
| Number of observations                                         | 963     |         |         |          |          |          |          |

Note: See note to Table S2.

Source: Belot et al.'s (2020) data and author's estimations

**Table S4: Individual Happiness during the COVID-19 Pandemic (Japanese Sample, Marginal Effects)**

|                                                                  | (1)                  | (2)                   | (3)                  | (4)                             | (5)                  | (6)                  | (7)                  |
|------------------------------------------------------------------|----------------------|-----------------------|----------------------|---------------------------------|----------------------|----------------------|----------------------|
|                                                                  | Extremely<br>unhappy | Moderately<br>unhappy | Slightly<br>unhappy  | Neither<br>happy nor<br>unhappy | Slightly<br>happy    | Moderately<br>happy  | Extremely<br>happy   |
| Negative nonfinancial effects                                    | 0.045***<br>[0.010]  | 0.045***<br>[0.009]   | 0.054***<br>[0.011]  | -0.026***<br>[0.007]            | -0.058***<br>[0.011] | -0.046***<br>[0.010] | -0.014***<br>[0.004] |
| Positive nonfinancial effects                                    | -0.020**<br>[0.008]  | -0.020**<br>[0.008]   | -0.024**<br>[0.010]  | 0.012**<br>[0.005]              | 0.026**<br>[0.010]   | 0.020**<br>[0.008]   | 0.006**<br>[0.003]   |
| Job loss                                                         |                      |                       |                      |                                 |                      |                      |                      |
| Temporary job lost                                               | -0.022<br>[0.030]    | -0.019<br>[0.024]     | -0.019<br>[0.022]    | 0.019<br>[0.027]                | 0.023<br>[0.027]     | 0.015<br>[0.018]     | 0.004<br>[0.005]     |
| No job lost                                                      | -0.033<br>[0.028]    | -0.030<br>[0.023]     | -0.032<br>[0.020]    | 0.026<br>[0.026]                | 0.036<br>[0.025]     | 0.026<br>[0.016]     | 0.007*<br>[0.004]    |
| Experienced a fall in household income                           | 0.017**<br>[0.008]   | 0.017**<br>[0.008]    | 0.020**<br>[0.010]   | -0.010**<br>[0.005]             | -0.022**<br>[0.010]  | -0.017**<br>[0.008]  | -0.005*<br>[0.003]   |
| Agreement with the current government's approach                 |                      |                       |                      |                                 |                      |                      |                      |
| Somewhat disagree                                                | -0.054**<br>[0.021]  | -0.043***<br>[0.016]  | -0.035***<br>[0.012] | 0.053**<br>[0.021]              | 0.046***<br>[0.016]  | 0.027***<br>[0.010]  | 0.006**<br>[0.003]   |
| Neither agree nor disagree                                       | -0.070***<br>[0.020] | -0.059***<br>[0.015]  | -0.055***<br>[0.011] | 0.064***<br>[0.020]             | 0.067***<br>[0.014]  | 0.043***<br>[0.009]  | 0.011***<br>[0.003]  |
| Somewhat agree                                                   | -0.078***<br>[0.020] | -0.068***<br>[0.016]  | -0.067***<br>[0.014] | 0.067***<br>[0.020]             | 0.079***<br>[0.016]  | 0.053***<br>[0.012]  | 0.014***<br>[0.004]  |
| Strongly agree                                                   | -0.093***<br>[0.022] | -0.089***<br>[0.020]  | -0.100***<br>[0.027] | 0.063***<br>[0.022]             | 0.110***<br>[0.026]  | 0.084***<br>[0.027]  | 0.025**<br>[0.011]   |
| Effectiveness of measures (aggregate, z-score)                   | -0.005<br>[0.003]    | -0.005<br>[0.003]     | -0.005<br>[0.004]    | 0.003<br>[0.002]                | 0.006<br>[0.004]     | 0.005<br>[0.003]     | 0.001<br>[0.001]     |
| Belief                                                           |                      |                       |                      |                                 |                      |                      |                      |
| Fraction of infected people                                      | -0.000<br>[0.000]    | -0.000<br>[0.000]     | -0.000<br>[0.000]    | 0.000<br>[0.000]                | 0.000<br>[0.000]     | 0.000<br>[0.000]     | 0.000<br>[0.000]     |
| Probability of being infected                                    | 0.001***<br>[0.000]  | 0.001***<br>[0.000]   | 0.001***<br>[0.000]  | -0.000**<br>[0.000]             | -0.001***<br>[0.000] | -0.001***<br>[0.000] | -0.000**<br>[0.000]  |
| Probability of infected people with no symptoms                  | -0.000<br>[0.000]    | -0.000<br>[0.000]     | -0.000<br>[0.000]    | 0.000<br>[0.000]                | 0.000<br>[0.000]     | 0.000<br>[0.000]     | 0.000<br>[0.000]     |
| Probability of serious illness without requiring hospitalization | -0.000*<br>[0.000]   | -0.000*<br>[0.000]    | -0.000*<br>[0.000]   | 0.000*<br>[0.000]               | 0.000*<br>[0.000]    | 0.000*<br>[0.000]    | 0.000*<br>[0.000]    |

|                                                                |          |          |          |           |           |           |           |
|----------------------------------------------------------------|----------|----------|----------|-----------|-----------|-----------|-----------|
|                                                                | [0.000]  | [0.000]  | [0.000]  | [0.000]   | [0.000]   | [0.000]   | [0.000]   |
| Probability of a serious illness that requires hospitalization | -0.000   | -0.000   | -0.000   | 0.000     | 0.000     | 0.000     | 0.000     |
|                                                                | [0.000]  | [0.000]  | [0.000]  | [0.000]   | [0.000]   | [0.000]   | [0.000]   |
| Probability that infected people would die                     | 0.001*** | 0.001*** | 0.001*** | -0.000*** | -0.001*** | -0.001*** | -0.000*** |
|                                                                | [0.000]  | [0.000]  | [0.000]  | [0.000]   | [0.000]   | [0.000]   | [0.000]   |
| Male                                                           | 0.033*** | 0.033*** | 0.040*** | -0.019*** | -0.042*** | -0.033*** | -0.010*** |
|                                                                | [0.008]  | [0.008]  | [0.009]  | [0.006]   | [0.010]   | [0.008]   | [0.003]   |
| Income groups                                                  |          |          |          |           |           |           |           |
| Second quintile                                                | 0.005    | 0.005    | 0.006    | -0.003    | -0.007    | -0.005    | -0.002    |
|                                                                | [0.011]  | [0.011]  | [0.013]  | [0.007]   | [0.014]   | [0.011]   | [0.003]   |
| Third quintile                                                 | 0.007    | 0.007    | 0.008    | -0.005    | -0.009    | -0.007    | -0.002    |
|                                                                | [0.011]  | [0.011]  | [0.013]  | [0.008]   | [0.014]   | [0.011]   | [0.003]   |
| Fourth quintile                                                | -0.009   | -0.010   | -0.012   | 0.004     | 0.013     | 0.011     | 0.003     |
|                                                                | [0.011]  | [0.012]  | [0.015]  | [0.005]   | [0.015]   | [0.013]   | [0.004]   |
| Fifth quintile                                                 | -0.005   | -0.006   | -0.007   | 0.003     | 0.007     | 0.006     | 0.002     |
|                                                                | [0.012]  | [0.012]  | [0.015]  | [0.006]   | [0.016]   | [0.013]   | [0.004]   |
| Preferred not to say                                           | 0.006    | 0.006    | 0.007    | -0.004    | -0.007    | -0.006    | -0.002    |
|                                                                | [0.023]  | [0.022]  | [0.025]  | [0.016]   | [0.028]   | [0.021]   | [0.006]   |
| Number of observations                                         | 1013     |          |          |           |           |           |           |

Note: See note to Table S2.

Source: Belot et al.'s (2020) data and author's estimations



**Table S5: Individual Happiness during the COVID-19 Pandemic (Italian Sample, Marginal Effects)**

|                                                                  | (1)                  | (2)                   | (3)                  | (4)                             | (5)                  | (6)                  | (7)                  |
|------------------------------------------------------------------|----------------------|-----------------------|----------------------|---------------------------------|----------------------|----------------------|----------------------|
|                                                                  | Extremely<br>unhappy | Moderately<br>unhappy | Slightly<br>unhappy  | Neither<br>happy nor<br>unhappy | Slightly<br>happy    | Moderately<br>happy  | Extremely<br>happy   |
| Negative nonfinancial effects                                    | 0.142***<br>[0.018]  | 0.110***<br>[0.013]   | 0.049***<br>[0.007]  | -0.111***<br>[0.015]            | -0.060***<br>[0.008] | -0.102***<br>[0.013] | -0.027***<br>[0.007] |
| Positive nonfinancial effects                                    | -0.077***<br>[0.026] | -0.060***<br>[0.020]  | -0.027***<br>[0.009] | 0.061***<br>[0.021]             | 0.033***<br>[0.012]  | 0.056***<br>[0.019]  | 0.015**<br>[0.006]   |
| Job loss                                                         |                      |                       |                      |                                 |                      |                      |                      |
| Temporary job lost                                               | -0.059**<br>[0.028]  | -0.038**<br>[0.016]   | -0.012***<br>[0.004] | 0.049**<br>[0.023]              | 0.021**<br>[0.009]   | 0.032**<br>[0.013]   | 0.007**<br>[0.003]   |
| No job lost                                                      | -0.061**<br>[0.029]  | -0.040**<br>[0.016]   | -0.013***<br>[0.004] | 0.050**<br>[0.024]              | 0.022**<br>[0.009]   | 0.034***<br>[0.013]  | 0.008**<br>[0.003]   |
| Experienced a fall in household income                           | 0.042***<br>[0.013]  | 0.032***<br>[0.010]   | 0.014***<br>[0.005]  | -0.033***<br>[0.010]            | -0.018***<br>[0.006] | -0.030***<br>[0.010] | -0.008***<br>[0.003] |
| Agreement with the current government's approach                 |                      |                       |                      |                                 |                      |                      |                      |
| Somewhat disagree                                                | -0.085**<br>[0.038]  | -0.041**<br>[0.017]   | -0.002<br>[0.005]    | 0.070**<br>[0.031]              | 0.023**<br>[0.010]   | 0.030**<br>[0.013]   | 0.006*<br>[0.003]    |
| Neither agree nor disagree                                       | -0.119***<br>[0.037] | -0.066***<br>[0.018]  | -0.012<br>[0.008]    | 0.098***<br>[0.029]             | 0.036***<br>[0.010]  | 0.051***<br>[0.015]  | 0.011**<br>[0.004]   |
| Somewhat agree                                                   | -0.113***<br>[0.035] | -0.061***<br>[0.015]  | -0.010**<br>[0.005]  | 0.094***<br>[0.028]             | 0.033***<br>[0.009]  | 0.047***<br>[0.011]  | 0.009***<br>[0.003]  |
| Strongly agree                                                   | -0.139***<br>[0.036] | -0.085***<br>[0.017]  | -0.023***<br>[0.007] | 0.115***<br>[0.028]             | 0.047***<br>[0.010]  | 0.070***<br>[0.014]  | 0.016***<br>[0.004]  |
| Effectiveness of measures (aggregate, z-score)                   | -0.009<br>[0.007]    | -0.007<br>[0.005]     | -0.003<br>[0.002]    | 0.007<br>[0.006]                | 0.004<br>[0.003]     | 0.006<br>[0.005]     | 0.002<br>[0.001]     |
| Belief                                                           |                      |                       |                      |                                 |                      |                      |                      |
| Fraction of infected people                                      | -0.000<br>[0.000]    | -0.000<br>[0.000]     | -0.000<br>[0.000]    | 0.000<br>[0.000]                | 0.000<br>[0.000]     | 0.000<br>[0.000]     | 0.000<br>[0.000]     |
| Probability of being infected                                    | 0.000<br>[0.000]     | 0.000<br>[0.000]      | 0.000<br>[0.000]     | -0.000<br>[0.000]               | -0.000<br>[0.000]    | -0.000<br>[0.000]    | -0.000<br>[0.000]    |
| Probability of infected people with no symptoms                  | -0.000<br>[0.000]    | -0.000<br>[0.000]     | -0.000<br>[0.000]    | 0.000<br>[0.000]                | 0.000<br>[0.000]     | 0.000<br>[0.000]     | 0.000<br>[0.000]     |
| Probability of serious illness without requiring hospitalization | 0.000                | 0.000                 | 0.000                | -0.000                          | -0.000               | -0.000               | -0.000               |

|                                                                |         |         |         |          |          |          |          |
|----------------------------------------------------------------|---------|---------|---------|----------|----------|----------|----------|
|                                                                | [0.000] | [0.000] | [0.000] | [0.000]  | [0.000]  | [0.000]  | [0.000]  |
| Probability of a serious illness that requires hospitalization | -0.000  | -0.000  | -0.000  | 0.000    | 0.000    | 0.000    | 0.000    |
|                                                                | [0.000] | [0.000] | [0.000] | [0.000]  | [0.000]  | [0.000]  | [0.000]  |
| Probability that infected people would die                     | 0.001** | 0.000** | 0.000** | -0.000** | -0.000** | -0.000** | -0.000** |
|                                                                | [0.000] | [0.000] | [0.000] | [0.000]  | [0.000]  | [0.000]  | [0.000]  |
| Male                                                           | -0.015  | -0.012  | -0.005  | 0.012    | 0.006    | 0.011    | 0.003    |
|                                                                | [0.011] | [0.009] | [0.004] | [0.009]  | [0.005]  | [0.008]  | [0.002]  |
| Income groups                                                  |         |         |         |          |          |          |          |
| Second quintile                                                | -0.000  | -0.000  | -0.000  | 0.000    | 0.000    | 0.000    | 0.000    |
|                                                                | [0.020] | [0.015] | [0.007] | [0.016]  | [0.008]  | [0.014]  | [0.004]  |
| Third quintile                                                 | -0.001  | -0.001  | -0.000  | 0.001    | 0.001    | 0.001    | 0.000    |
|                                                                | [0.019] | [0.015] | [0.007] | [0.015]  | [0.008]  | [0.014]  | [0.004]  |
| Fourth quintile                                                | -0.000  | -0.000  | -0.000  | 0.000    | 0.000    | 0.000    | 0.000    |
|                                                                | [0.019] | [0.015] | [0.007] | [0.015]  | [0.008]  | [0.014]  | [0.004]  |
| Fifth quintile                                                 | -0.008  | -0.006  | -0.003  | 0.006    | 0.003    | 0.006    | 0.002    |
|                                                                | [0.021] | [0.017] | [0.008] | [0.017]  | [0.009]  | [0.016]  | [0.004]  |
| Preferred not to say                                           | 0.079   | 0.046*  | 0.011** | -0.064   | -0.025*  | -0.038*  | -0.009*  |
|                                                                | [0.058] | [0.027] | [0.005] | [0.046]  | [0.015]  | [0.021]  | [0.005]  |
| Number of observations                                         | 1044    |         |         |          |          |          |          |

Note: See note to Table S2.

Source: Belot et al.'s (2020) data and author's estimations

**Table S6: Individual Happiness during the COVID-19 Pandemic (British Sample, Marginal Effects)**

|                                                                  | (1)                  | (2)                   | (3)                  | (4)                             | (5)                  | (6)                  | (7)                  |
|------------------------------------------------------------------|----------------------|-----------------------|----------------------|---------------------------------|----------------------|----------------------|----------------------|
|                                                                  | Extremely<br>unhappy | Moderately<br>unhappy | Slightly<br>unhappy  | Neither<br>happy nor<br>unhappy | Slightly<br>happy    | Moderately<br>happy  | Extremely<br>happy   |
| Negative nonfinancial effects                                    | 0.109***<br>[0.014]  | 0.110***<br>[0.013]   | 0.085***<br>[0.009]  | -0.002<br>[0.006]               | -0.071***<br>[0.009] | -0.176***<br>[0.016] | -0.056***<br>[0.009] |
| Positive nonfinancial effects                                    | -0.057***<br>[0.012] | -0.058***<br>[0.012]  | -0.045***<br>[0.009] | 0.001<br>[0.003]                | 0.037***<br>[0.008]  | 0.093***<br>[0.019]  | 0.029***<br>[0.007]  |
| Job loss                                                         |                      |                       |                      |                                 |                      |                      |                      |
| Temporary job lost                                               | 0.001<br>[0.021]     | 0.001<br>[0.020]      | 0.000<br>[0.014]     | -0.000<br>[0.003]               | -0.000<br>[0.014]    | -0.001<br>[0.030]    | -0.000<br>[0.008]    |
| No job lost                                                      | -0.016<br>[0.021]    | -0.016<br>[0.020]     | -0.012<br>[0.014]    | 0.001<br>[0.003]                | 0.011<br>[0.013]     | 0.026<br>[0.030]     | 0.008<br>[0.008]     |
| Experienced a fall in household income                           | 0.017*<br>[0.009]    | 0.017*<br>[0.010]     | 0.013*<br>[0.007]    | -0.000<br>[0.001]               | -0.011*<br>[0.006]   | -0.027*<br>[0.015]   | -0.009*<br>[0.005]   |
| Agreement with the current government's approach                 |                      |                       |                      |                                 |                      |                      |                      |
| Somewhat disagree                                                | -0.142**<br>[0.055]  | -0.054***<br>[0.018]  | 0.008<br>[0.011]     | 0.064***<br>[0.024]             | 0.054***<br>[0.019]  | 0.062***<br>[0.021]  | 0.008**<br>[0.003]   |
| Neither agree nor disagree                                       | -0.196***<br>[0.052] | -0.097***<br>[0.018]  | -0.013<br>[0.013]    | 0.083***<br>[0.023]             | 0.087***<br>[0.017]  | 0.116***<br>[0.022]  | 0.019***<br>[0.005]  |
| Somewhat agree                                                   | -0.218***<br>[0.051] | -0.121***<br>[0.017]  | -0.031**<br>[0.012]  | 0.085***<br>[0.023]             | 0.103***<br>[0.017]  | 0.152***<br>[0.018]  | 0.029***<br>[0.005]  |
| Strongly agree                                                   | -0.232***<br>[0.051] | -0.140***<br>[0.018]  | -0.049***<br>[0.014] | 0.081***<br>[0.023]             | 0.114***<br>[0.017]  | 0.185***<br>[0.021]  | 0.040***<br>[0.007]  |
| Effectiveness of measures (aggregate, z-score)                   | -0.004<br>[0.004]    | -0.004<br>[0.004]     | -0.003<br>[0.003]    | 0.000<br>[0.000]                | 0.003<br>[0.003]     | 0.007<br>[0.007]     | 0.002<br>[0.002]     |
| Belief                                                           |                      |                       |                      |                                 |                      |                      |                      |
| Fraction of infected people                                      | 0.000<br>[0.000]     | 0.000<br>[0.000]      | 0.000<br>[0.000]     | -0.000<br>[0.000]               | -0.000<br>[0.000]    | -0.000<br>[0.000]    | -0.000<br>[0.000]    |
| Probability of being infected                                    | 0.000<br>[0.000]     | 0.000<br>[0.000]      | 0.000<br>[0.000]     | -0.000<br>[0.000]               | -0.000<br>[0.000]    | -0.000<br>[0.000]    | -0.000<br>[0.000]    |
| Probability of infected people with no symptoms                  | -0.000*<br>[0.000]   | -0.000*<br>[0.000]    | -0.000*<br>[0.000]   | 0.000<br>[0.000]                | 0.000*<br>[0.000]    | 0.001*<br>[0.000]    | 0.000*<br>[0.000]    |
| Probability of serious illness without requiring hospitalization | -0.000               | -0.000                | -0.000               | 0.000                           | 0.000                | 0.000                | 0.000                |

|                                                                |         |          |          |         |         |         |         |
|----------------------------------------------------------------|---------|----------|----------|---------|---------|---------|---------|
|                                                                | [0.000] | [0.000]  | [0.000]  | [0.000] | [0.000] | [0.000] | [0.000] |
| Probability of a serious illness that requires hospitalization | 0.000   | 0.000    | 0.000    | -0.000  | -0.000  | -0.000  | -0.000  |
|                                                                | [0.000] | [0.000]  | [0.000]  | [0.000] | [0.000] | [0.000] | [0.000] |
| Probability that infected people would die                     | 0.000   | 0.000    | 0.000    | -0.000  | -0.000  | -0.000  | -0.000  |
|                                                                | [0.000] | [0.000]  | [0.000]  | [0.000] | [0.000] | [0.000] | [0.000] |
| Male                                                           | -0.013  | -0.013   | -0.010   | 0.000   | 0.009   | 0.021   | 0.007   |
|                                                                | [0.008] | [0.008]  | [0.006]  | [0.001] | [0.005] | [0.013] | [0.004] |
| Income groups                                                  |         |          |          |         |         |         |         |
| Second quintile                                                | -0.022  | -0.022   | -0.016   | 0.001   | 0.014   | 0.034   | 0.010   |
|                                                                | [0.014] | [0.014]  | [0.010]  | [0.002] | [0.009] | [0.021] | [0.006] |
| Third quintile                                                 | -0.018  | -0.017   | -0.013   | 0.002   | 0.012   | 0.027   | 0.008   |
|                                                                | [0.014] | [0.014]  | [0.010]  | [0.002] | [0.009] | [0.021] | [0.006] |
| Fourth quintile                                                | -0.027* | -0.028** | -0.021** | 0.001   | 0.018*  | 0.044** | 0.014** |
|                                                                | [0.014] | [0.014]  | [0.011]  | [0.002] | [0.009] | [0.022] | [0.007] |
| Fifth quintile                                                 | -0.012  | -0.011   | -0.008   | 0.001   | 0.008   | 0.017   | 0.005   |
|                                                                | [0.015] | [0.015]  | [0.010]  | [0.002] | [0.010] | [0.022] | [0.006] |
| Preferred not to say                                           | 0.057   | 0.041    | 0.020**  | -0.018  | -0.032  | -0.055  | -0.013* |
|                                                                | [0.046] | [0.028]  | [0.010]  | [0.018] | [0.023] | [0.036] | [0.008] |
| Number of observations                                         | 1015    |          |          |         |         |         |         |

Note: See note to Table S2.

Source: Belot et al.'s (2020) data and author's estimations

**Table S7: Individual Happiness during the COVID-19 Pandemic (American Sample, Marginal Effects)**

|                                                                  | (1)                  | (2)                   | (3)                  | (4)                             | (5)                  | (6)                  | (7)                  |
|------------------------------------------------------------------|----------------------|-----------------------|----------------------|---------------------------------|----------------------|----------------------|----------------------|
|                                                                  | Extremely<br>unhappy | Moderately<br>unhappy | Slightly<br>unhappy  | Neither<br>happy nor<br>unhappy | Slightly<br>happy    | Moderately<br>happy  | Extremely<br>happy   |
| Negative nonfinancial effects                                    | 0.086***<br>[0.013]  | 0.091***<br>[0.013]   | 0.059***<br>[0.008]  | 0.009*<br>[0.005]               | -0.038***<br>[0.006] | -0.130***<br>[0.016] | -0.077***<br>[0.012] |
| Positive nonfinancial effects                                    | -0.036***<br>[0.012] | -0.038***<br>[0.012]  | -0.024***<br>[0.008] | -0.004<br>[0.002]               | 0.016***<br>[0.005]  | 0.054***<br>[0.017]  | 0.032***<br>[0.011]  |
| Job loss                                                         |                      |                       |                      |                                 |                      |                      |                      |
| Temporary job lost                                               | 0.000<br>[0.019]     | 0.000<br>[0.019]      | 0.000<br>[0.011]     | -0.000<br>[0.001]               | -0.000<br>[0.009]    | -0.000<br>[0.026]    | -0.000<br>[0.014]    |
| No job lost                                                      | -0.016<br>[0.019]    | -0.016<br>[0.019]     | -0.010<br>[0.011]    | -0.001<br>[0.001]               | 0.007<br>[0.009]     | 0.023<br>[0.026]     | 0.013<br>[0.014]     |
| Experienced a fall in household income                           | 0.024**<br>[0.010]   | 0.025**<br>[0.010]    | 0.016**<br>[0.007]   | 0.002<br>[0.002]                | -0.011**<br>[0.004]  | -0.036**<br>[0.014]  | -0.021**<br>[0.009]  |
| Agreement with the current government's approach                 |                      |                       |                      |                                 |                      |                      |                      |
| Somewhat disagree                                                | 0.046<br>[0.031]     | 0.033<br>[0.022]      | 0.012<br>[0.009]     | -0.015<br>[0.010]               | -0.020<br>[0.013]    | -0.041<br>[0.028]    | -0.015<br>[0.011]    |
| Neither agree nor disagree                                       | -0.032<br>[0.023]    | -0.031<br>[0.021]     | -0.018<br>[0.011]    | 0.003<br>[0.005]                | 0.015<br>[0.011]     | 0.042<br>[0.027]     | 0.020<br>[0.013]     |
| Somewhat agree                                                   | -0.035*<br>[0.021]   | -0.034*<br>[0.018]    | -0.019**<br>[0.009]  | 0.003<br>[0.005]                | 0.017*<br>[0.010]    | 0.046*<br>[0.024]    | 0.022**<br>[0.011]   |
| Strongly agree                                                   | -0.053**<br>[0.021]  | -0.056***<br>[0.019]  | -0.036***<br>[0.010] | -0.003<br>[0.006]               | 0.025**<br>[0.010]   | 0.079***<br>[0.025]  | 0.043***<br>[0.012]  |
| Effectiveness of measures (aggregate, z-score)                   | 0.002<br>[0.004]     | 0.002<br>[0.004]      | 0.001<br>[0.003]     | 0.000<br>[0.000]                | -0.001<br>[0.002]    | -0.003<br>[0.006]    | -0.002<br>[0.004]    |
| Belief                                                           |                      |                       |                      |                                 |                      |                      |                      |
| Fraction of infected people                                      | -0.000<br>[0.000]    | -0.000<br>[0.000]     | -0.000<br>[0.000]    | -0.000<br>[0.000]               | 0.000<br>[0.000]     | 0.001<br>[0.000]     | 0.000<br>[0.000]     |
| Probability of being infected                                    | 0.000<br>[0.000]     | 0.000<br>[0.000]      | 0.000<br>[0.000]     | 0.000<br>[0.000]                | -0.000<br>[0.000]    | -0.000<br>[0.000]    | -0.000<br>[0.000]    |
| Probability of infected people with no symptoms                  | 0.000<br>[0.000]     | 0.000<br>[0.000]      | 0.000<br>[0.000]     | 0.000<br>[0.000]                | -0.000<br>[0.000]    | -0.000<br>[0.000]    | -0.000<br>[0.000]    |
| Probability of serious illness without requiring hospitalization | -0.000<br>[0.000]    | -0.000<br>[0.000]     | -0.000<br>[0.000]    | -0.000<br>[0.000]               | 0.000<br>[0.000]     | 0.000<br>[0.000]     | 0.000<br>[0.000]     |

|                                                                |           |           |           |         |          |          |          |
|----------------------------------------------------------------|-----------|-----------|-----------|---------|----------|----------|----------|
|                                                                | [0.000]   | [0.000]   | [0.000]   | [0.000] | [0.000]  | [0.000]  | [0.000]  |
| Probability of a serious illness that requires hospitalization | -0.000    | -0.000    | -0.000    | -0.000  | 0.000    | 0.000    | 0.000    |
|                                                                | [0.000]   | [0.000]   | [0.000]   | [0.000] | [0.000]  | [0.000]  | [0.000]  |
| Probability that infected people would die                     | 0.000     | 0.000     | 0.000     | 0.000   | -0.000   | -0.000   | -0.000   |
|                                                                | [0.000]   | [0.000]   | [0.000]   | [0.000] | [0.000]  | [0.000]  | [0.000]  |
| Male                                                           | -0.002    | -0.002    | -0.002    | -0.000  | 0.001    | 0.004    | 0.002    |
|                                                                | [0.009]   | [0.009]   | [0.006]   | [0.001] | [0.004]  | [0.013]  | [0.008]  |
| Income groups                                                  |           |           |           |         |          |          |          |
| Second quintile                                                | -0.032*   | -0.030**  | -0.016**  | 0.003   | 0.015*   | 0.040**  | 0.020**  |
|                                                                | [0.017]   | [0.015]   | [0.008]   | [0.003] | [0.008]  | [0.020]  | [0.010]  |
| Third quintile                                                 | -0.043*** | -0.041*** | -0.024*** | 0.002   | 0.019*** | 0.057*** | 0.030*** |
|                                                                | [0.016]   | [0.015]   | [0.009]   | [0.004] | [0.007]  | [0.020]  | [0.011]  |
| Fourth quintile                                                | -0.042**  | -0.041*** | -0.023*** | 0.002   | 0.019**  | 0.056*** | 0.029*** |
|                                                                | [0.017]   | [0.015]   | [0.009]   | [0.004] | [0.008]  | [0.021]  | [0.011]  |
| Fifth quintile                                                 | -0.048*** | -0.047*** | -0.028*** | 0.001   | 0.022*** | 0.066*** | 0.036*** |
|                                                                | [0.018]   | [0.017]   | [0.010]   | [0.004] | [0.008]  | [0.024]  | [0.013]  |
| Preferred not to say                                           | -0.021    | -0.019    | -0.010    | 0.003   | 0.010    | 0.025    | 0.012    |
|                                                                | [0.040]   | [0.038]   | [0.021]   | [0.004] | [0.018]  | [0.051]  | [0.026]  |
| Number of observations                                         | 1054      |           |           |         |          |          |          |

Note: See note to Table S2.

Source: Belot et al.'s (2020) data and author's estimations
